# Supplementary material for: The tapetal AHL family protein TEK determines nexine formation in the pollen wall
Source: PubMed Central journal article supplement (PMC4024750; doi:10.1038/ncomms4855), 2014-05-08
Supplement: ncomms4855-s1.pdf [file ncomms4855-s1.pdf]

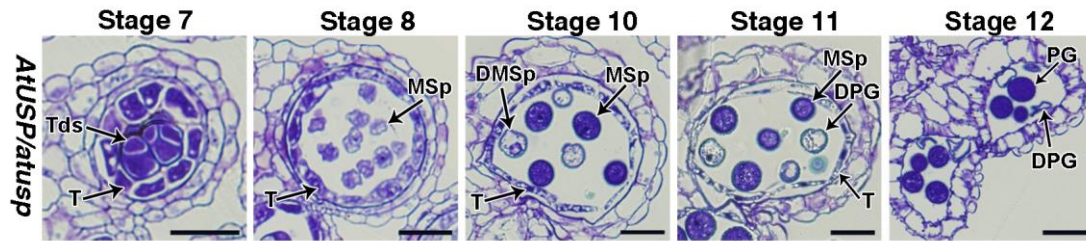

**Supplementary Figure 1.** Semi-thin sections of *atusp/+* plant.

Half microspores in *atusp/+* locule are defective. T, tapetum; Tds, tetrads; MSp, microspore; DMSp, degenerated microspores; PG, pollen grain; DPG, degenerated pollen grain. Bars=20 um.

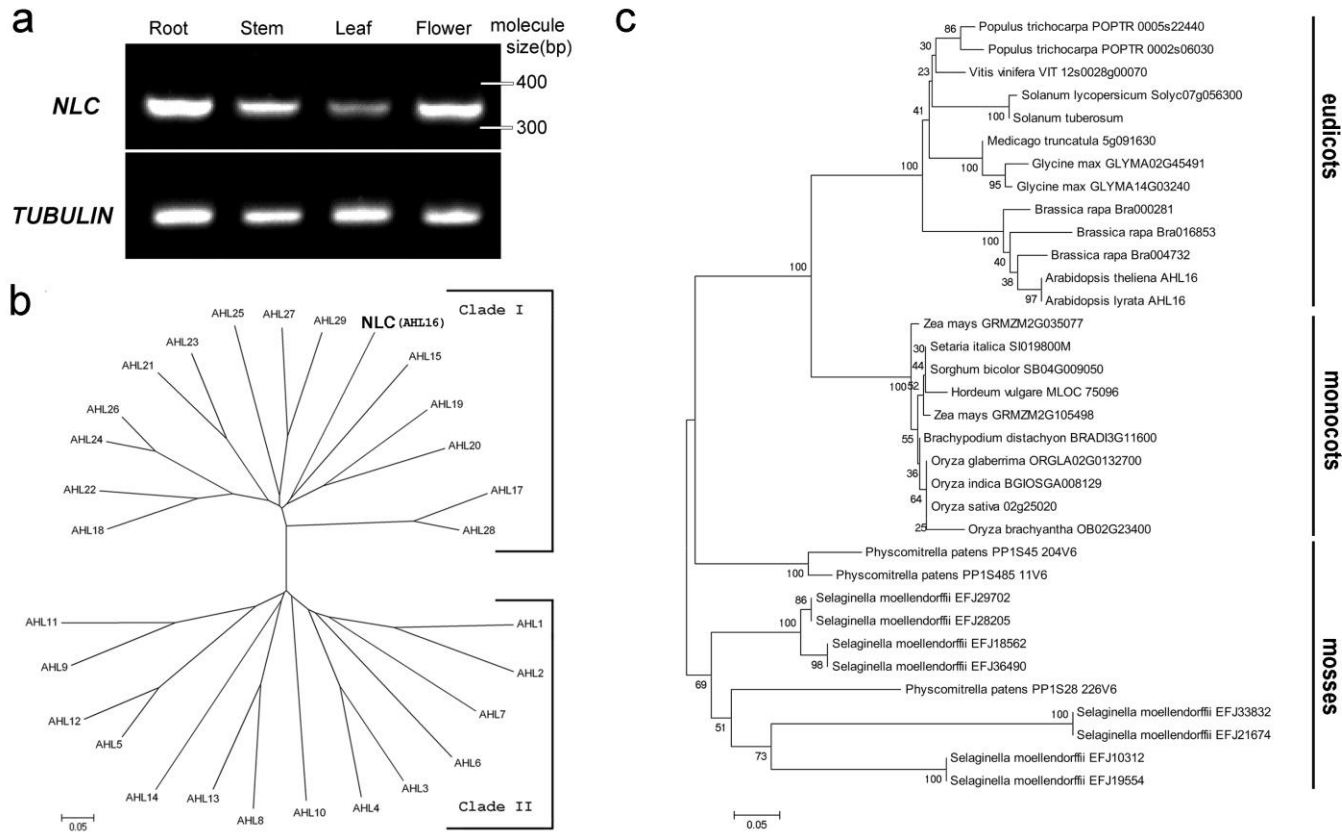

**Supplementary Figure 2.** Characterization of *NLC* gene.

**a,** *NLC* is widely expressed in root, stem, leaf and flower tissues by RT-PCR analysis.

**b,** Phylogenetic tree of the *Arabidopsis NLC* homologues distinguishing two clade based on different type of AT-hook motifs.

**c,** Phylogenetic tree of *NLC* homologues. Sequences from <http://plants.ensembl.org/index.html> are aligned and used to construct an unrooted maximum likelihood tree by MEGA3.1. Bar = 0.05 amino acid substitutions.

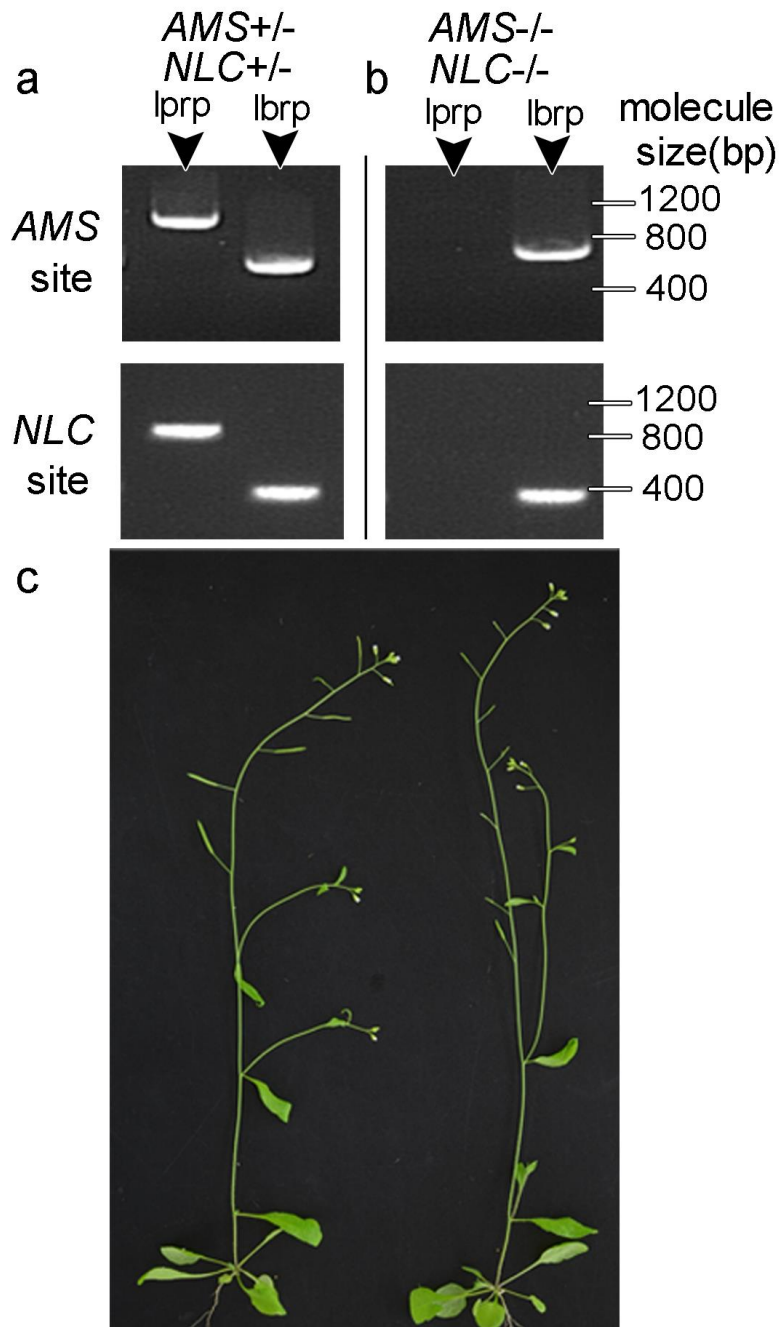

**Supplementary Figure 3.** Identification of *ams nlc* double mutant plant.

**a,** Genotyping of F1 heterozygous plant of *ams nlc* double mutant.

**b,** Genotyping of *ams nlc* homozygous plant.

**c,** *ams nlc* is the sterile plant with normal vegetable growth.

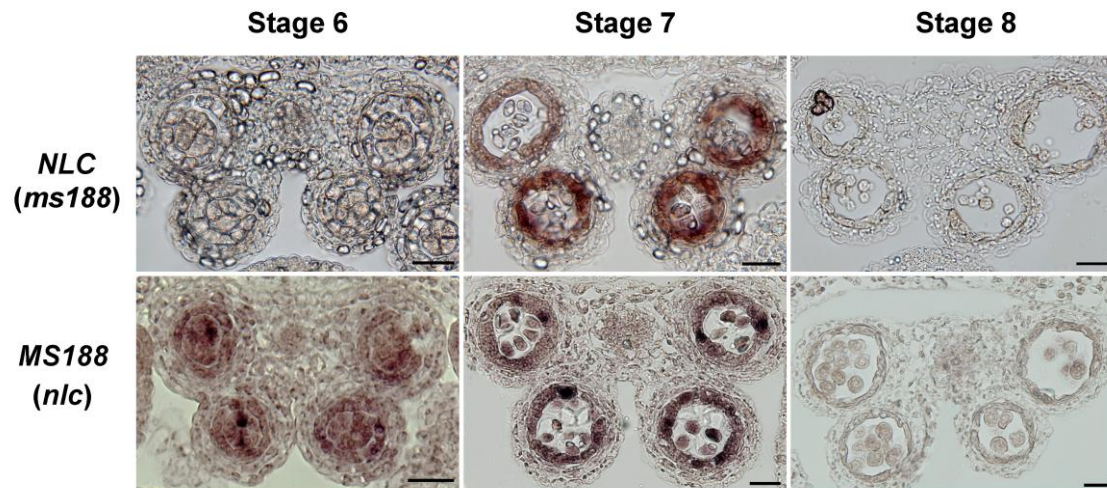

**Supplementary Figure 4.** Expression patterns of *NLC* and *MS188* in *ms188* and *nlc* mutant background, respectively.

Expression pattern of *NLC* is not affected in *ms188*, meanwhile expression pattern of *MS188* is not affected in *nlc*. Bars=20um.

**Supplementary Table 1. Genes expression in *nlc* buds compared with the wild type and pollen wall integrality in mutants**

| Function path           | GeneName         | AtID        | Flod Chang of Log2 | Pollen Wall Integrality |        |        | References |
|-------------------------|------------------|-------------|--------------------|-------------------------|--------|--------|------------|
|                         |                  |             |                    | sexine                  | nexine | intine |            |
| sporopollenin synthesis | <i>AMS</i>       | At2G16910   | 0.46 ± 0.28        | —                       | —      | —      | 1          |
|                         | <i>MS188</i>     | At5G56110   | 0.51 ± 0.07        | —                       | +      | +      | 2          |
|                         | <i>ACOS5</i>     | At1G62940   | 0.94 ± 0.17        | —                       | ※      | +      | 3          |
|                         | <i>CYP703A2</i>  | At1G01280   | 0.99 ± 0.17        | —                       | ※      | +      | 4          |
|                         | <i>CYP704B1</i>  | At1G69500   | 0.70 ± 0.06        | —                       | +      | +      | 5          |
|                         | <i>TKRP1</i>     | At4G35420   | 0.93 ± 0.16        | —                       | +      | ?      | 6          |
|                         | <i>MS1</i>       | At5G22260   | -0.73 ± 0.22       | ※                       | +      | ?      | 7,8        |
|                         | <i>MS2</i>       | At3G11980   | 0.17 ± 0.23        | —                       | +      | ?      | 9          |
|                         | <i>LAP3</i>      | At3G59530   | 0.72 ± 0.21        | ※                       | +      | +      | 10         |
|                         | <i>LAP5/PKSB</i> | At4G34850   | 1.16 ± 0.20        | ※                       | +      | +      | 11,12      |
|                         | <i>LAP6/PKSA</i> | At1G02050   | 0.73 ± 0.07        | ※                       | +      | +      | 11,12      |
| <i>FLP1</i>             | At5G57800        | 0.19 ± 0.34 | ※                  | +                       | +      | 13     |            |
| transport protein       | <i>ABCG26</i>    | At3G13220   | 1.13 ± 0.40        | —                       | +      | +      | 14,15      |
| intine synthesis        | <i>AtUSP</i>     | At5G52560   | 0.28 ± 0.12        | +                       | +      | —      | 16         |
|                         | <i>FLA3</i>      | At2G24450   | -6.06 ± 0.29       | +                       | +      | —      | 17         |

Pollen wall integrity of each mutant is marked +, normal; —, absent; ※, abnormal; ?, unknown.

Gene expressions are used log<sub>2</sub>-transformed expression ratios (±SD) from three independent hybridization slides.

The references are orderly listed in the Supplementary figure legend.

**Supplementary Table 2. List of primers used in the study and their sequences**

| Prime     | Sequence                             | Note                                                      |          |
|-----------|--------------------------------------|-----------------------------------------------------------|----------|
| Bar-F     | 5'-GCACCATCGTCAACCACTAC-3'           | Amplifying the BAR gene for indentify the T-DNA insertion |          |
| Bar-R     | 5'-TGCCAGAAACCCACGTCAT-3'            |                                                           |          |
| AtLB1     | 5'-ATACGACGGATCGTAATTTGTC-3'         | For Tail-PCR                                              |          |
| AtLB2     | 5'-TAATAACGCTGCGGACATCTAC-3'         |                                                           |          |
| AtLB3     | 5'-TTGACCATCATACTCATTGCTG-3'         |                                                           |          |
| ILP       | 5'-ATAACAATGGCTGGAGGTACAG-3'         | Identifying the T-DNA insertion site and mutant phenotype |          |
| IRP       | 5'-GAAACGTGGAGATTAG AGCAG TAG -3'    |                                                           |          |
| CLP-F     | 5'-AACAACTCTCGAAATTTTAGGC-3'         | For complementation                                       |          |
| CRP-R     | 5'-CGTGAGGTGCAAGGAGAA-3'             |                                                           |          |
| CLPV-F    | 5'-CTGAGAGCATTACCCAAAGC-3'           | Verifying the background of the transformants             |          |
| CRPV-R    | 5'-TTATATCATTGCCTGGAG ACG-3'         |                                                           |          |
| GFP-F     | 5'-ATGGCTGGAGGTACAGCTCT-3'           | For p35S: <i>NLC</i> -GFP fusion                          |          |
| GFP-R     | 5'-AGGTTTCGACATGACA CGC-3'           |                                                           |          |
| RTNLC-F   | 5'-AAGAACAAACCCAAACCACC-3'           | For Real Time-PCR                                         |          |
| RTNLC-R   | 5'-AACAAACAGGACCAGATGCG-3'           |                                                           |          |
| Tublin-F  | 5'-GATTTCAAAGATTAGGGAAGAGTA-3'       |                                                           |          |
| Tublin-R  | 5'-GTTCTGAAGCAAATGTCATAGAG-3'        | For recombinant MBP-AMS protein                           |          |
| AMSpMAL-F | 5'-GGATCCATGGAGAGTAATATGCAAAACTTG-3' |                                                           |          |
| AMSpMAL-R | 5'-CTGCAGTTATTGGTTGTGGTAATGGTTGA-3'  |                                                           |          |
| NLC-F     | 5'-TCGGATTTTGCAAGAAGGA-3'            | For non-radioactive RNA in situ hybridization             |          |
| NLC-R     | 5'-CCAAGAGTAGATATCAGA AGCC-3'        |                                                           |          |
| MS188-F   | 5'-GATGTGGGAAGAGTTGTAGGC-3'          | For non-radioactive RNA in situ hybridization             |          |
| MS188-R   | 5'-GAAAGTTGTTTGGGTTAGG GT-3'         |                                                           |          |
| USP-F     | 5'-TCTGGTTGCTGGTGGTC-3'              | For qChIP-PCR                                             |          |
| USP-R     | 5'-TACTGTATTTGTTGTGAGGGTCT-3'        |                                                           |          |
| P1-F      | 5'-GGCACAGGTCGAGGACGA-3'             | For qChIP-PCR                                             |          |
| P1-R      | 5'-CCACTGCTCTGTATTTTATCGC-3'         |                                                           |          |
| P2-F      | 5'-GATTTTAGTTTTGGTCCCAAAAAG-3'       |                                                           |          |
| P2-R      | 5'-CAAATTTATTTTGCAAAAAAAGAA-3'       |                                                           |          |
| P3-F      | 5'-CTCCTACTCCTCACAATCATTCTTT-3'      |                                                           |          |
| P3-R      | 5'-TGTTATGAATGTTGTTATATGTTCAACT-3'   |                                                           |          |
| S1-F      | 5'-AAGTTGTGTTTTTTCCCAAGTCA-3'        |                                                           |          |
| S1-R      | 5'-CCATCCCCACAACCTTGTG-3'            |                                                           |          |
| S2-F      | 5'-CAGAGAACTGAACTAATTTTCCA-3'        |                                                           |          |
| S2-R      | 5'-CTTGAATATCGATCAAAATGTAAATATA-3'   |                                                           |          |
| S3-F      | 5'-GGAGTTGACCAGGCGTTGA-3'            |                                                           |          |
| S3-R      | 5'-AACAAAAATGAAAACATAGTAAAAATT-3'    |                                                           |          |
| ENLC-F    | 5' AGCATTATTATGAATCTCTCTGTTA 3'      |                                                           | For EMSA |

ENLC-R 5' TTGTTATATGTTCAACTGAAAGATT 3'  
EMS188-F 5' CAGAGAACTGAACTAATTTCCA 3'  
EMS188-R 5' GAATTGAAAATTAGATGAGAGACA 3'

---

### Supplementary References:

1. Xu, J. *et al.* The ABORTED MICROSPORES regulatory network is required for postmeiotic male reproductive development in *Arabidopsis thaliana*. *Plant Cell* **22**, 91-107 (2010).
2. Zhang, Z.B. *et al.* Transcription factor AtMYB103 is required for anther development by regulating tapetum development, callose dissolution and exine formation in *Arabidopsis*. *Plant J* **52**, 528-538 (2007).
3. de Azevedo Souza C. *et al.* A novel fatty Acyl-CoA synthetase is required for pollen development and sporopollenin biosynthesis in *Arabidopsis*. *Plant Cell* **21**, 507–525 (2009).
4. Morant M. *et al.* CYP703 is an ancient cytochrome P450 in land plants catalyzing in-chain hydroxylation of lauric acid to provide building blocks for sporopollenin synthesis in pollen. *Plant Cell* **19**, 1473–1487 (2007).
5. Dobritsa AA. *et al.* CYP704B1 is a long-chain fatty acid omega-hydroxylase essential for sporopollenin synthesis in pollen of *Arabidopsis*. *Plant Physiol* **151**, 574–589 (2009).
6. Grienberger E. *et al.* Analysis of TETRAKETIDE  $\alpha$ -PYRONE REDUCTASE function in *Arabidopsis thaliana* reveals a previously unknown, but conserved, biochemical pathway in sporopollenin monomer biosynthesis. *Plant Cell* **22**, 4067–4083 (2010).
7. Ito T. *et al.* *Arabidopsis* MALE STERILITY1 encodes a PHD-type transcription factor and regulates pollen and tapetum development. *Plant Cell* **19**, 3549–3562 (2007).
8. Yang C, Vizcay-Barrena G, Conner K & Wilson Z.A. MALE STERILITY1 is required for tapetal development and pollen wall biosynthesis. *Plant Cell* **19**, 3530–3548 (2007).
9. Aarts M.G. *et al.* The *Arabidopsis* MALE STERILITY 2 protein shares similarity with reductases in elongation/condensation complexes. *Plant J* **12**, 615-23(1997).



10. Dobritsa A.A. *et al.* LAP3, a novel plant protein required for pollen development, is essential for proper exine formation. *Sex Plant Reprod* **22**, 167-77 (2009).
11. Dobritsa, A.A. *et al.* LAP5 and LAP6 encode anther-specific proteins with similarity to chalcone synthase essential for pollen exine development in Arabidopsis. *Plant Physiol.* **153**, 937-955 (2010).
12. Kim S.S. *et al.* LAP6/POLYKETIDE SYNTHASE A and LAP5/POLYKETIDE SYNTHASE B Encode Hydroxyalkyl-Pyrone Synthases Required for Pollen Development and Sporopollenin Biosynthesis in Arabidopsis thaliana. *Plant Cell* **22**, 4045–4066 (2010).
13. Ariizumi T. *et al.* A novel male–sterile mutant of Arabidopsis thaliana, faceless pollen-1, produces pollen with a smooth surface and an acetolysis–sensitive exine. *Plant Mol Biol* **53**, 107–116 (2003).
14. Quilichini, T.D., Friedmann, M.C., Samuels, A.L. & Douglas, C.J. ATP-binding cassette transporter G26 is required for male fertility and pollen exine formation in Arabidopsis. *Plant Physiol.* **154**, 678-690 (2010).
15. Dou, X.Y. *et al.* WBC27, an adenosine tri-phosphate-binding cassette protein, controls pollen wall formation and patterning in Arabidopsis. *J Integr Plant Biol* **53**, 74-88 (2011).
16. Schnurr J.A., Storey K.K., Jung H.J., Somers D.A. & Gronwald J.W. UDP-sugar pyrophosphorylase is essential for pollen development in Arabidopsis. *Planta* **224**, 520–532 (2006).
17. Li J., Yu M., Geng L.L. & Zhao J. The fasciclin-like arabinogalactan protein gene, FLA3, is involved in microspore development of Arabidopsis. *Plant J* **64**, 482–497 (2010).
